# Supplementary material for: p-JAK2 plays a key role in catalpol-induced protection against rat intestinal ischemia/reperfusion injury
Source: Royal Society of Chemistry journal article supplement (doi:10.1039/c7ra10506a), 2017-01-01
Supplement: c7ra10506a1.pdf [file c7ra10506a1.pdf]

## Supplemental Table1. The information for each antibody used in the present work.

| Antibody         | Source | Dilutions | Catalog Number | Company                      |
|------------------|--------|-----------|----------------|------------------------------|
| $\beta$ -actin   | Rabbit | 1:2000    | 20536-1-AP     | Proteintech,<br>Wuhan, China |
| p-JAK2           | Rabbit | 1:500     | AP0531         | Abclonal, Woburn,<br>USA     |
| JAK2             | Rabbit | 1:1000    | A7694          | Abclonal, Woburn,<br>USA     |
| p-STAT3          | Rabbit | 1:1000    | AP0070         | Abclonal, Woburn,<br>USA     |
| STAT3            | Rabbit | 1:1000    | A1192          | Abclonal, Woburn,<br>USA     |
| occludin         | Rabbit | 1:1000    | 13409-1-AP     | Proteintech,<br>Wuhan, China |
| ZO-1             | Rabbit | 1:1000    | sc-10804       | Santa Cruz, CA, USA          |
| Bcl-2            | Rabbit | 1:1000    | 12789-1-AP     | Proteintech,<br>Wuhan, China |
| Bax              | Rabbit | 1:1000    | 50599-2-Ig     | Proteintech,<br>Wuhan, China |
| cleaved caspase3 | Rabbit | 1:1000    | 25546-1-AP     | Proteintech,<br>Wuhan, China |

# Rat

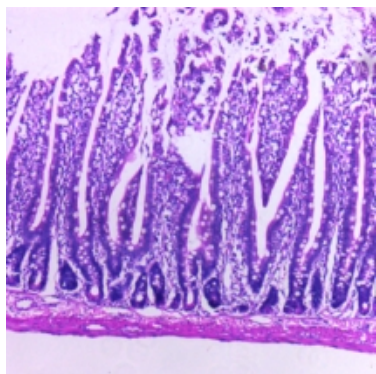

1

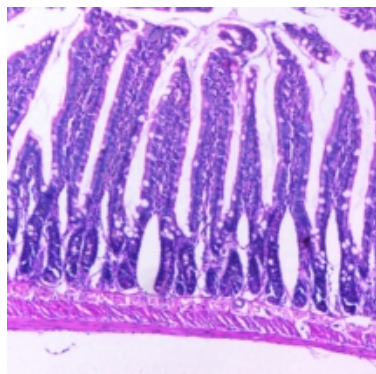

2

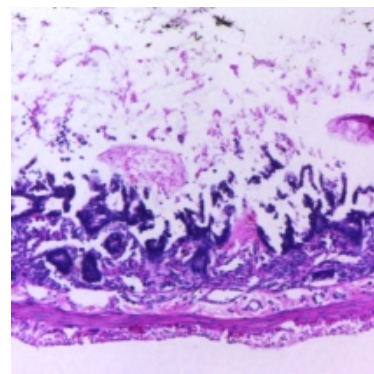

3

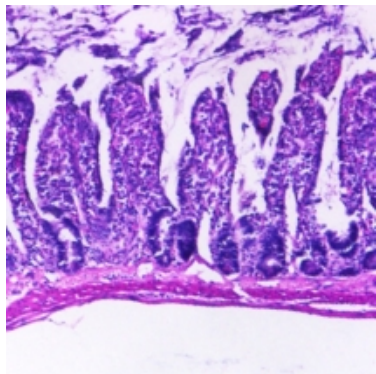

4

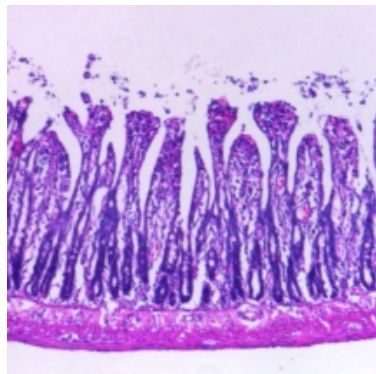

5

1: Sham    2: catalpol(H)+Sham    3: I/R    4: catalpol(L)+I/R    5: catalpol(H)+I/R

# Rat

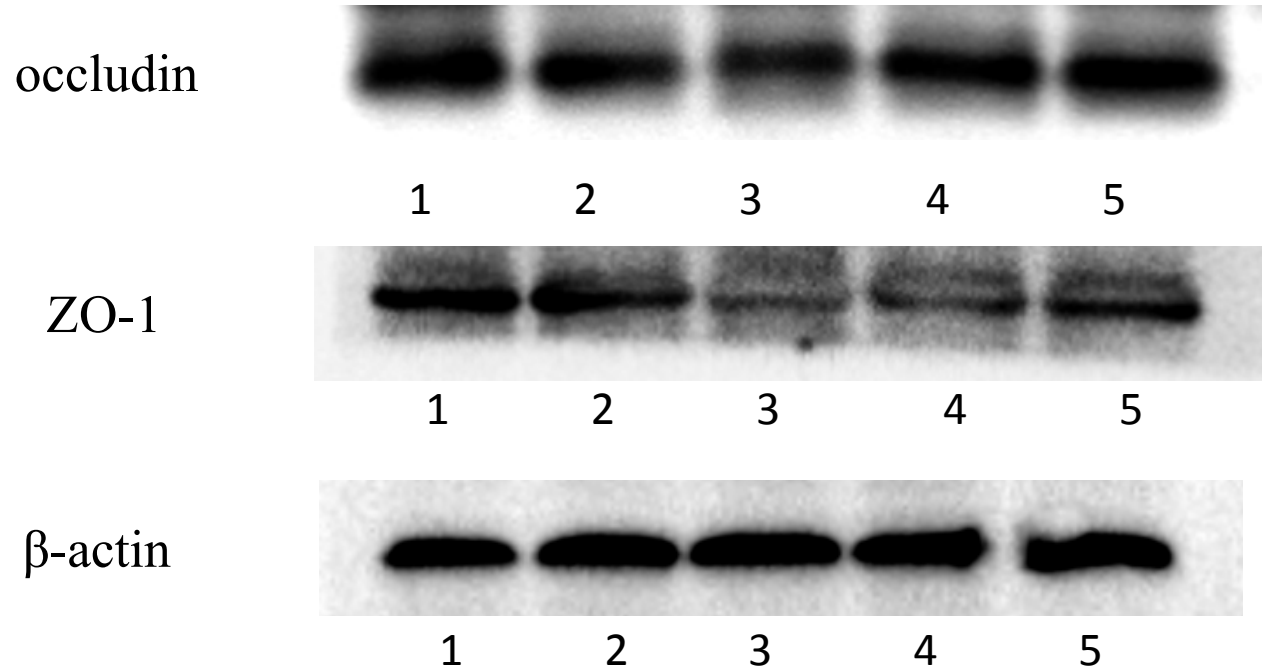

1: Sham    2: catalpol(H)+Sham    3: I/R    4: catalpol(L)+I/R    5: catalpol(H)+I/R

# Rat

occludin

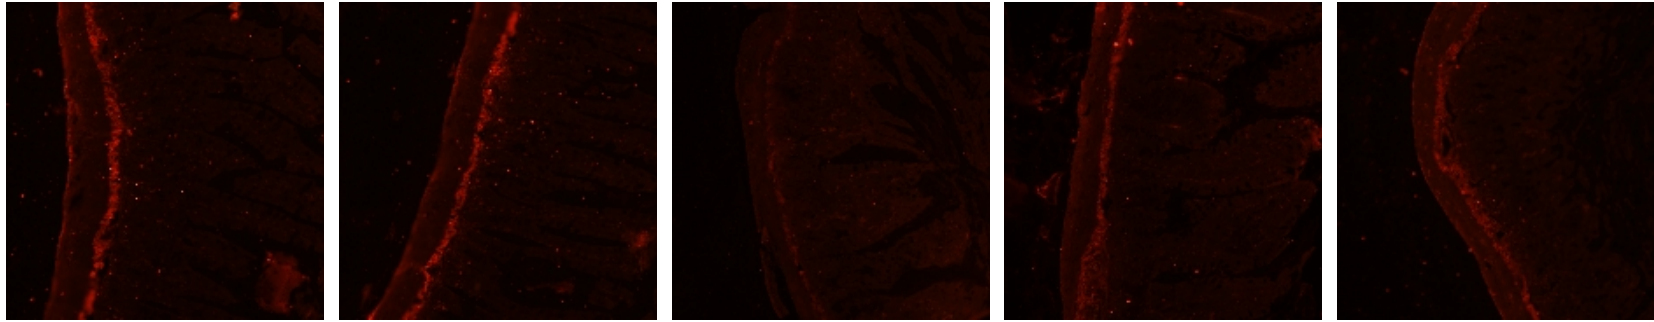

1

2

3

4

5

DAPI

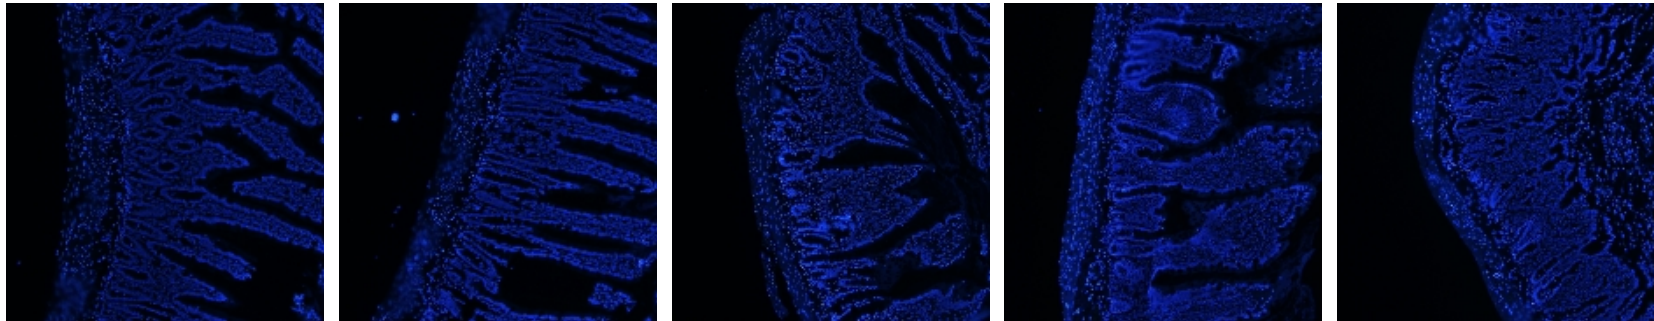

1

2

3

4

5

1: Sham

2: catalpol(H)+Sham

3: I/R

4: catalpol(L)+I/R

5: catalpol(H)+I/R

# Rat

ZO-1

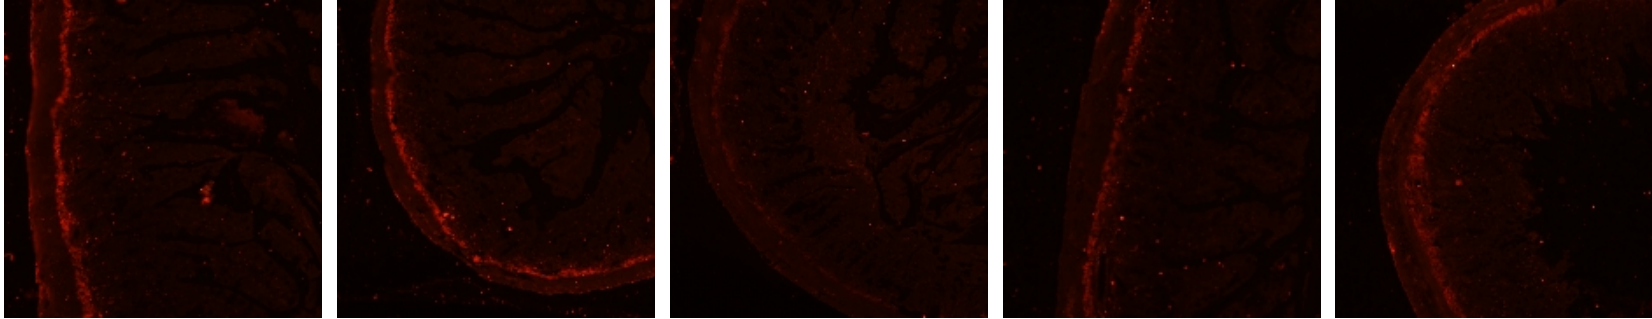

1

2

3

4

5

DAPI

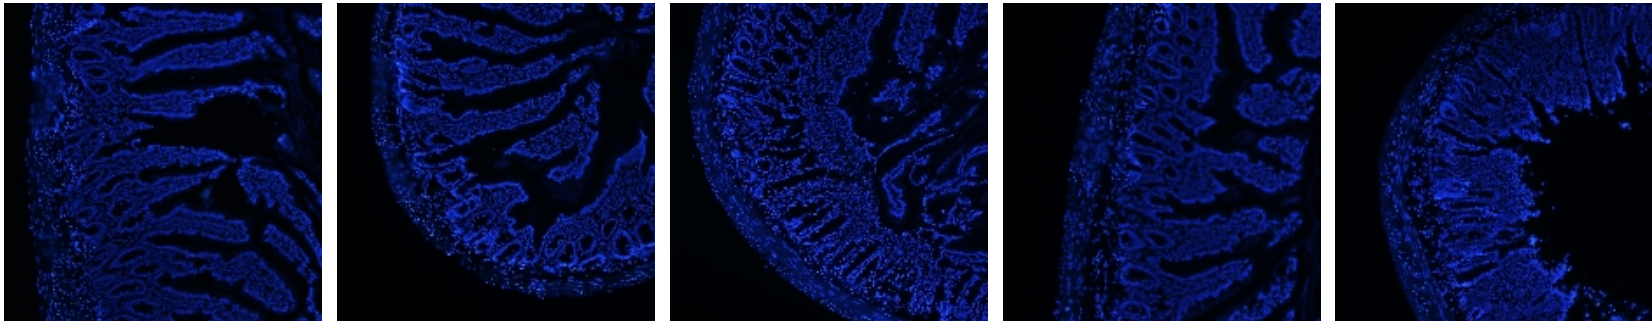

1

2

3

4

5

1: Sham    2: catalpol(H)+Sham    3: I/R    4: catalpol(L)+I/R    5: catalpol(H)+I/R



# Rat

TUNEL

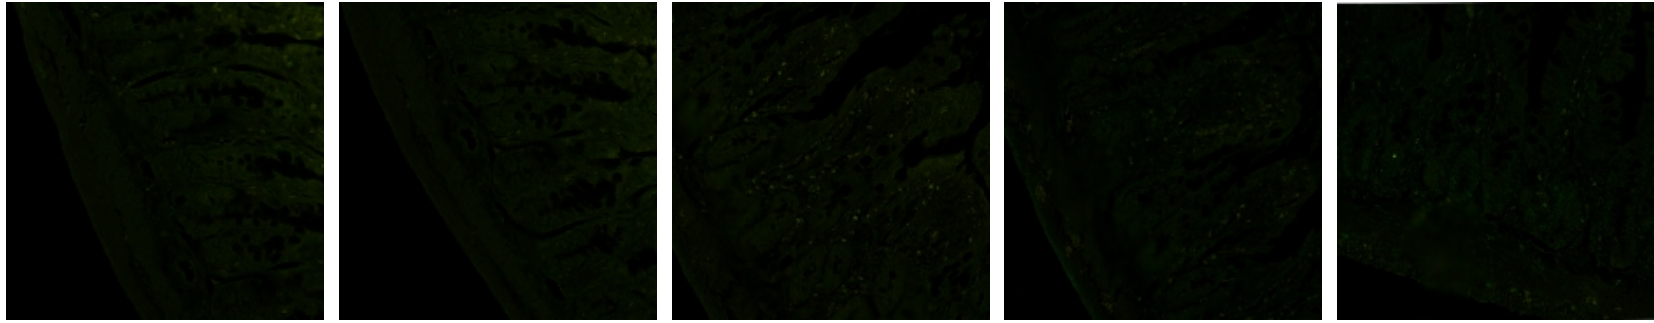

1

2

3

4

5

DAPI

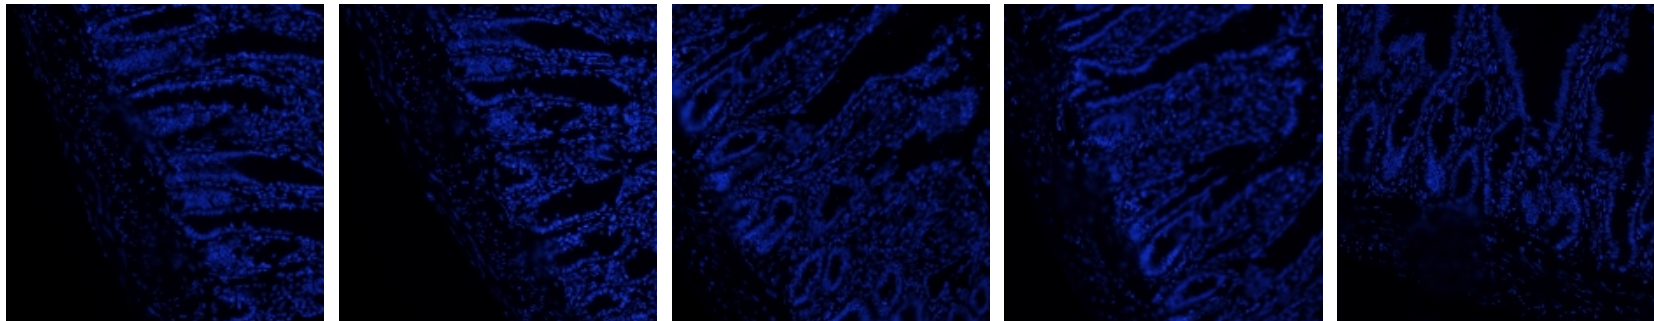

1

2

3

4

5

1: Sham    2: catalpol(H)+Sham    3: I/R    4: catalpol(L)+I/R    5: catalpol(H)+I/R

# Rat

P-JAK2

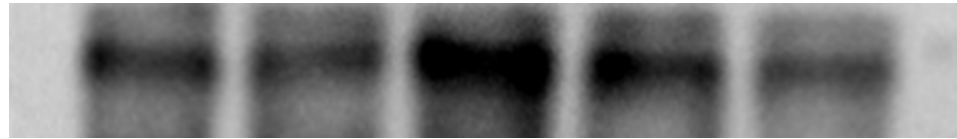

1

2

3

4

5

JAK2

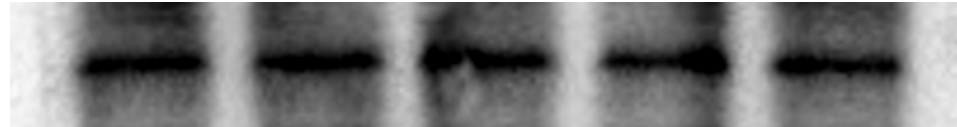

1

2

3

4

5

1: Sham    2: catalpol(H)+Sham    3: I/R    4: catalpol(L)+I/R    5: catalpol(H)+I/R

# Rat

P-STAT3

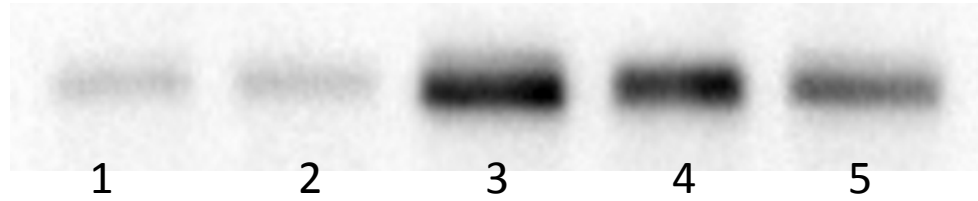

STAT3

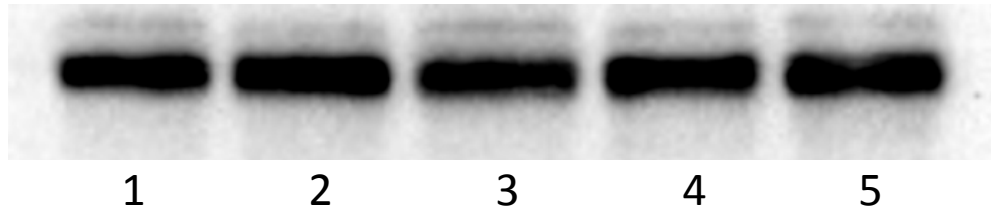

$\beta$ -actin

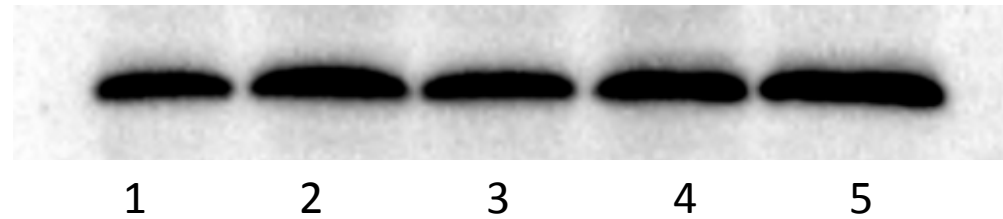

1: Sham    2: catalpol(H)+Sham    3: I/R    4: catalpol(L)+I/R    5: catalpol(H)+I/R



# Rat

Bcl-2

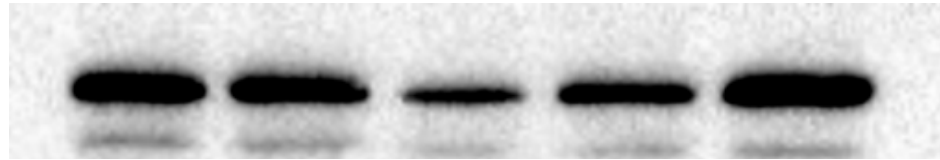

1

2

3

4

5

Bax

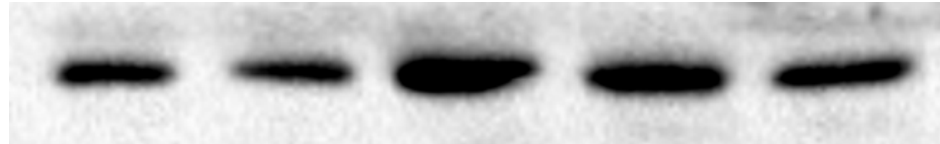

1

2

3

4

5

1: Sham

2: catalpol(H)+Sham

3: I/R

4: catalpol(L)+I/R

5: catalpol(H)+I/R

# Rat

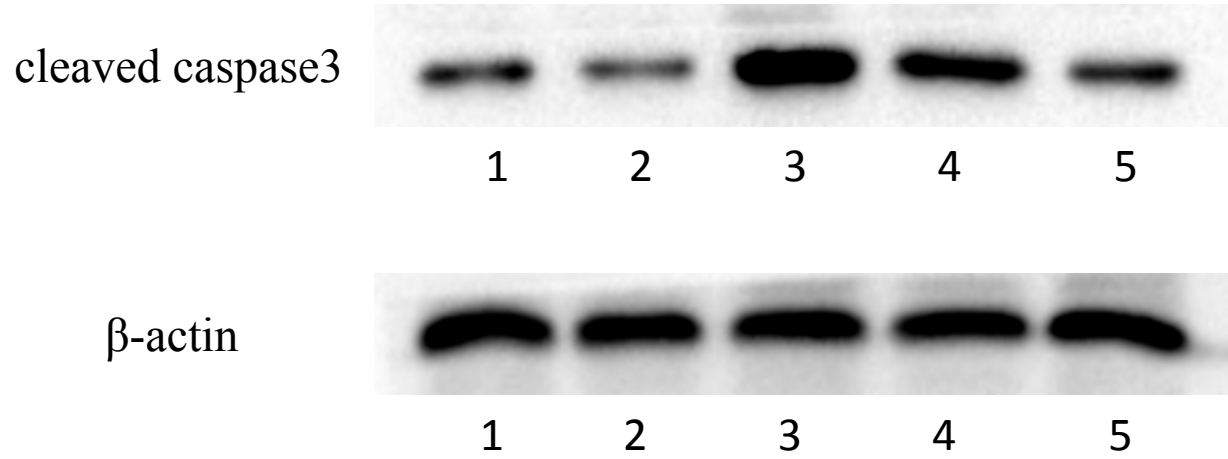

1: Sham    2: catalpol(H)+Sham    3: I/R    4: catalpol(L)+I/R    5: catalpol(H)+I/R

Cell

TUNEL

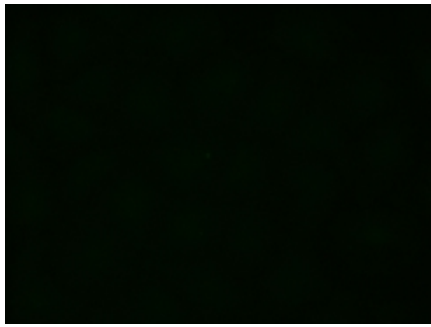

1

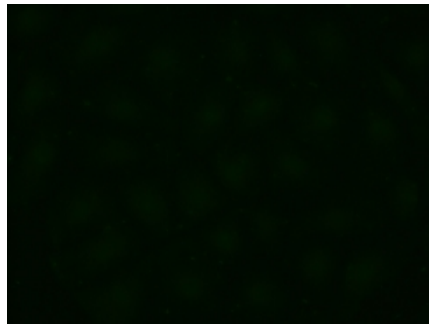

2

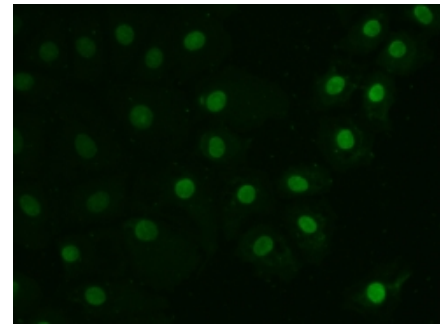

3

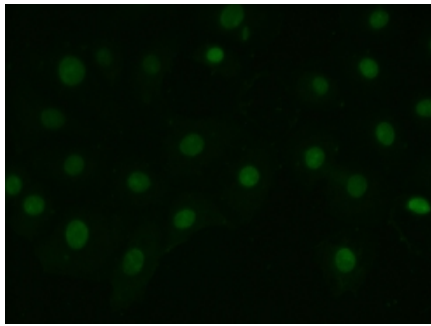

4

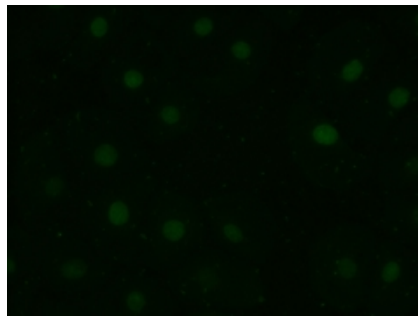

5

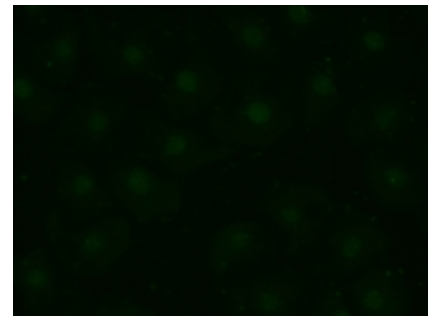

6

|                    | 1                        | 2                        | 3                        | 4  | 5  | 6  |
|--------------------|--------------------------|--------------------------|--------------------------|----|----|----|
| catalpol( $\mu$ M) | <input type="checkbox"/> | 40                       | <input type="checkbox"/> | 10 | 20 | 40 |
| H/R                | <input type="checkbox"/> | <input type="checkbox"/> | +                        | +  | +  | +  |

Cell

AO/EB

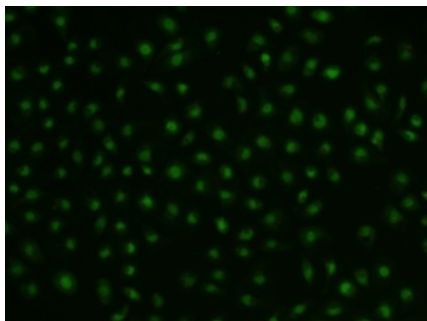

1

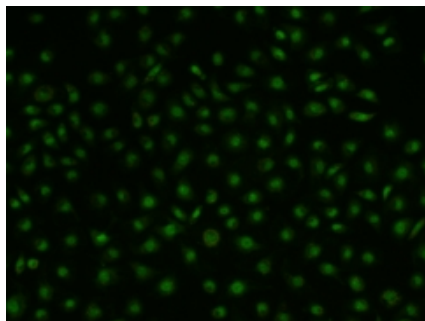

2

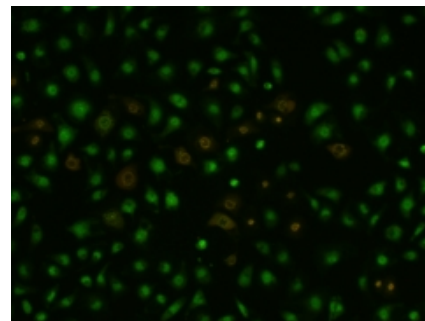

3

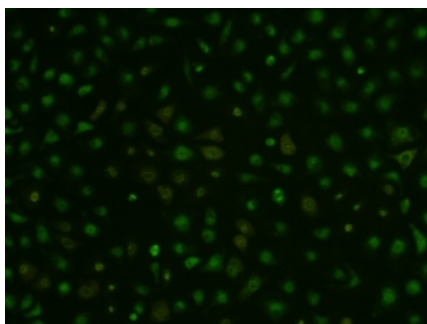

4

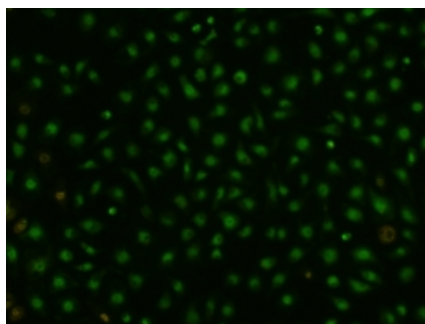

5

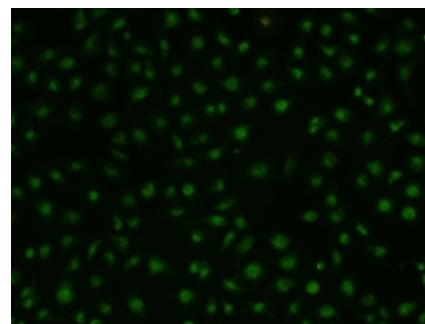

6

|                           | 1 | 2  | 3 | 4  | 5  | 6  |
|---------------------------|---|----|---|----|----|----|
| catalpol( $\mu\text{M}$ ) | □ | 40 | □ | 10 | 20 | 40 |
| H/R                       | □ | □  | + | +  | +  | +  |

# Cell

P-JAK2

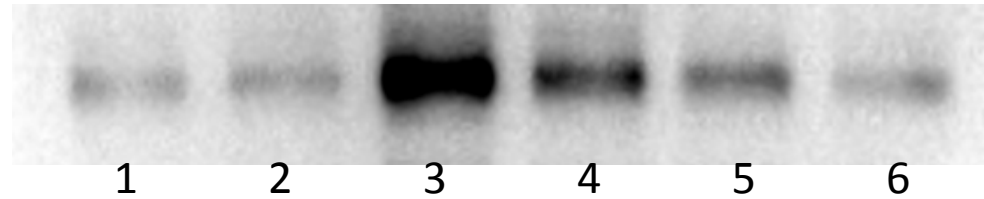

JAK2

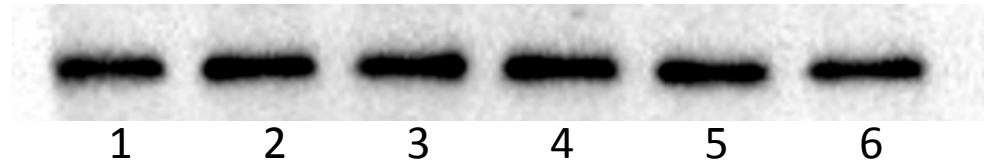

|                    | 1                        | 2                        | 3                        | 4  | 5  | 6  |
|--------------------|--------------------------|--------------------------|--------------------------|----|----|----|
| catalpol( $\mu$ M) | <input type="checkbox"/> | 40                       | <input type="checkbox"/> | 10 | 20 | 40 |
| H/R                | <input type="checkbox"/> | <input type="checkbox"/> | +                        | +  | +  | +  |

# Cell

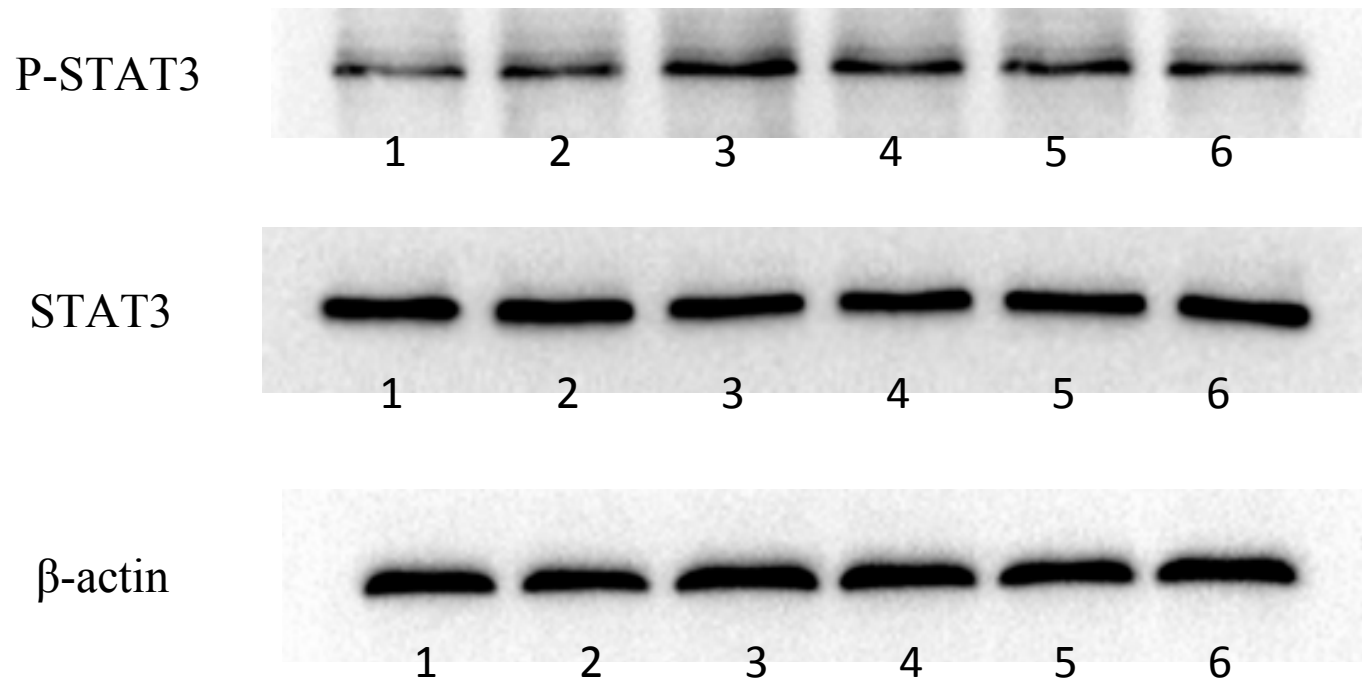

|                    | 1                        | 2                        | 3                        | 4  | 5  | 6  |
|--------------------|--------------------------|--------------------------|--------------------------|----|----|----|
| catalpol( $\mu$ M) | <input type="checkbox"/> | 40                       | <input type="checkbox"/> | 10 | 20 | 40 |
| H/R                | <input type="checkbox"/> | <input type="checkbox"/> | +                        | +  | +  | +  |



# Cell

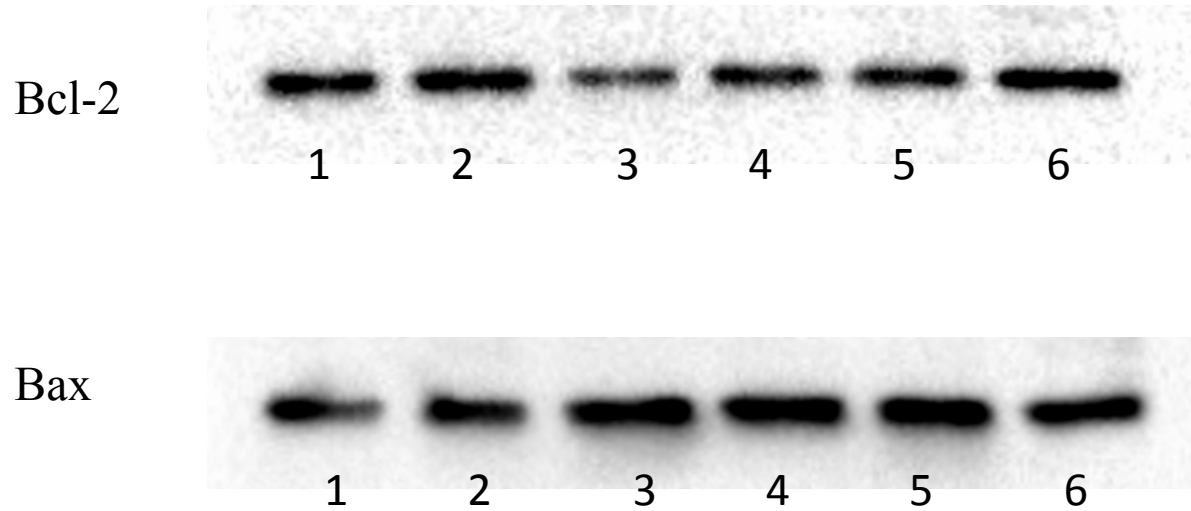

|                    | 1                        | 2                        | 3                        | 4  | 5  | 6  |
|--------------------|--------------------------|--------------------------|--------------------------|----|----|----|
| catalpol( $\mu$ M) | <input type="checkbox"/> | 40                       | <input type="checkbox"/> | 10 | 20 | 40 |
| H/R                | <input type="checkbox"/> | <input type="checkbox"/> | +                        | +  | +  | +  |

# Cell

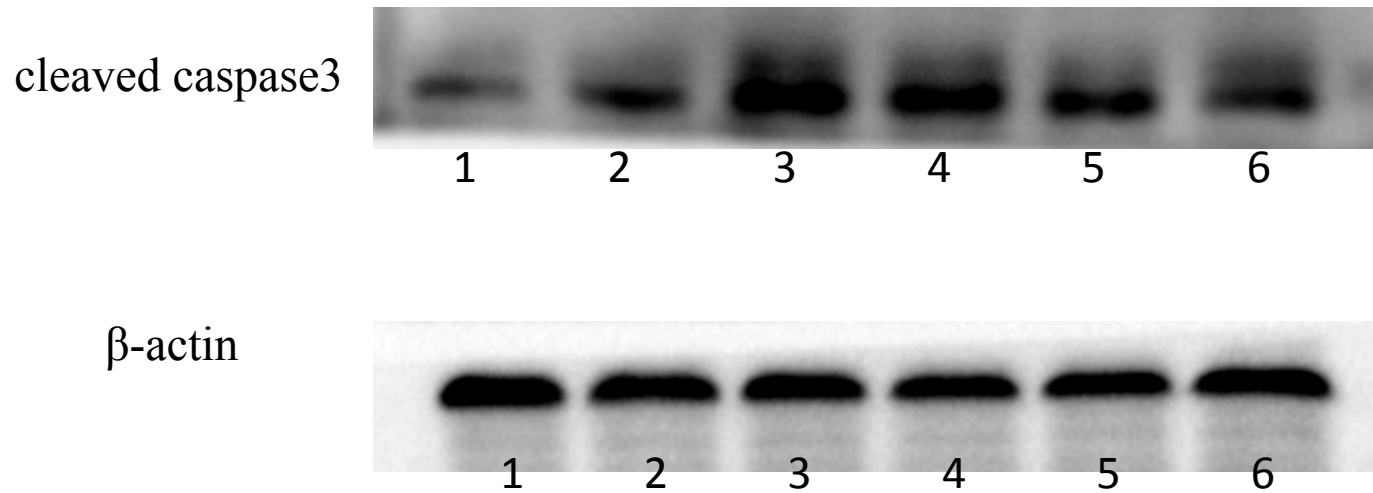

|                    | 1                        | 2                        | 3                        | 4  | 5  | 6  |
|--------------------|--------------------------|--------------------------|--------------------------|----|----|----|
| catalpol( $\mu$ M) | <input type="checkbox"/> | 40                       | <input type="checkbox"/> | 10 | 20 | 40 |
| H/R                | <input type="checkbox"/> | <input type="checkbox"/> | +                        | +  | +  | +  |

# Cell

P-STAT3

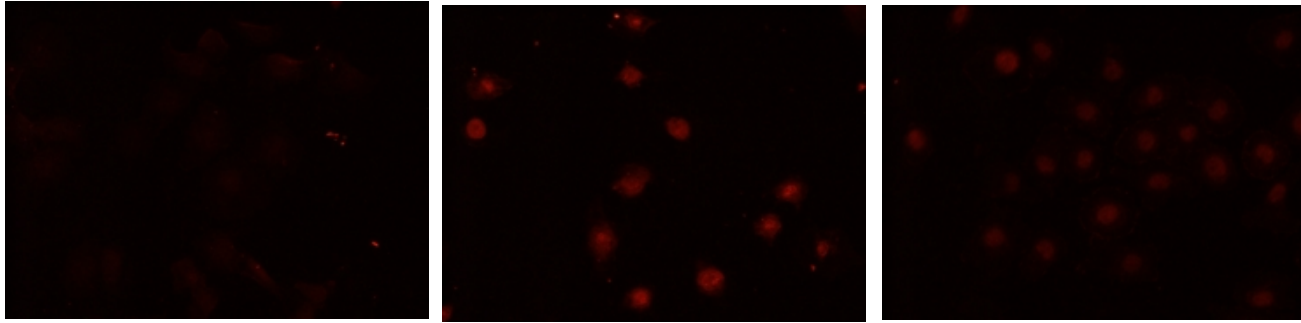

DAPI

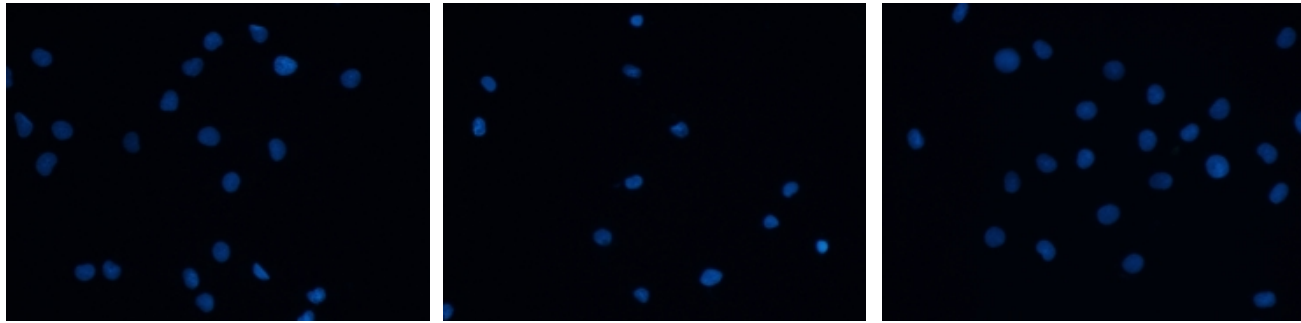

Merge

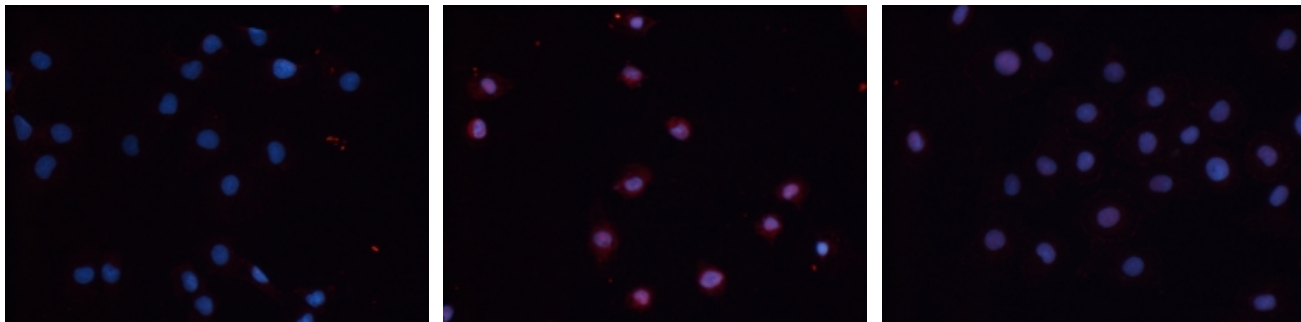

catalpol( $\mu$ M)

□

□

40

H/R

□

+

+

# Cell

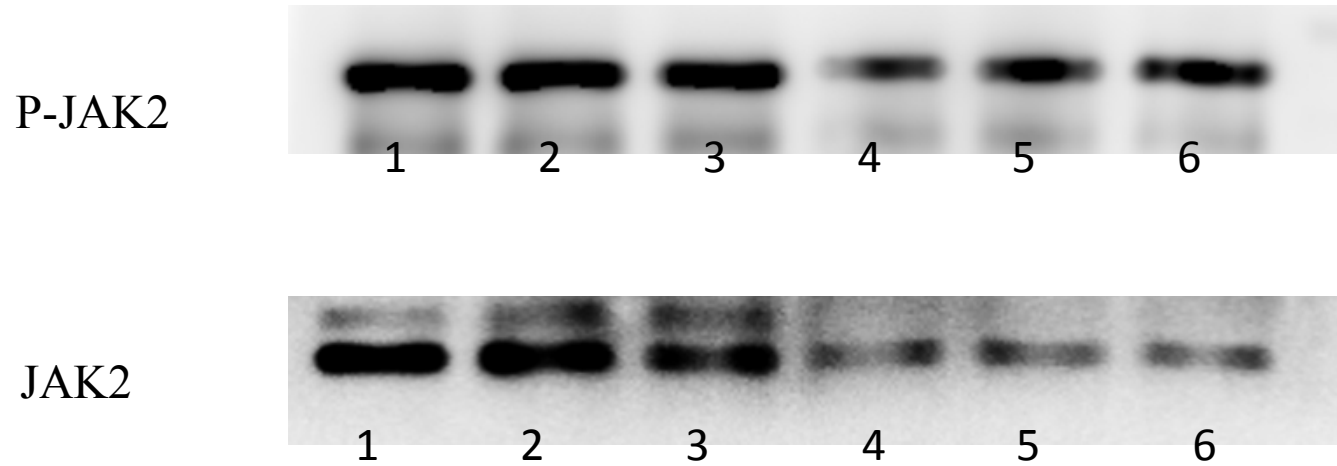

|                    | 1                        | 2                        | 3                        | 4                        | 5                        | 6                        |
|--------------------|--------------------------|--------------------------|--------------------------|--------------------------|--------------------------|--------------------------|
| control siRNA      | +                        | +                        | +                        | <input type="checkbox"/> | <input type="checkbox"/> | <input type="checkbox"/> |
| JAK2 siRNA         | <input type="checkbox"/> | <input type="checkbox"/> | <input type="checkbox"/> | +                        | +                        | +                        |
| catalpol( $\mu$ M) | <input type="checkbox"/> | <input type="checkbox"/> | 40                       | <input type="checkbox"/> | <input type="checkbox"/> | 40                       |
| H/R                | <input type="checkbox"/> | +                        | +                        | <input type="checkbox"/> | +                        | +                        |

# Cell

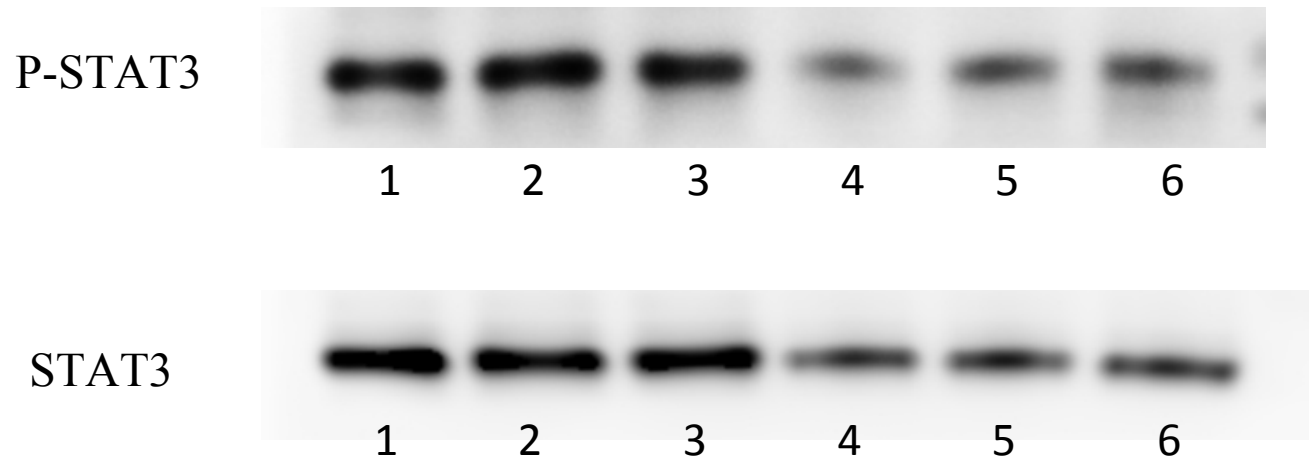

|               | 1 | 2 | 3  | 4 | 5 | 6  |
|---------------|---|---|----|---|---|----|
| control siRNA | + | + | +  | □ | □ | □  |
| JAK2 siRNA    | □ | □ | □  | + | + | +  |
| catalpol(μM)  | □ | □ | 40 | □ | □ | 40 |
| H/R           | □ | + | +  | □ | + | +  |

# Cell

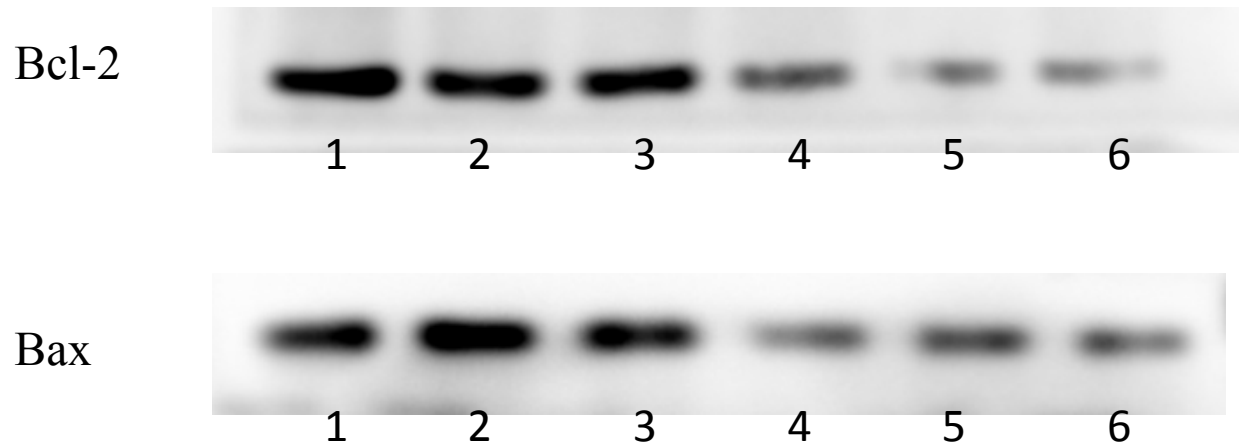

|                    | 1 | 2 | 3  | 4 | 5 | 6  |
|--------------------|---|---|----|---|---|----|
| control siRNA      | + | + | +  | □ | □ | □  |
| JAK2 siRNA         | □ | □ | □  | + | + | +  |
| catalpol( $\mu$ M) | □ | □ | 40 | □ | □ | 40 |
| H/R                | □ | + | +  | □ | + | +  |



# Cell

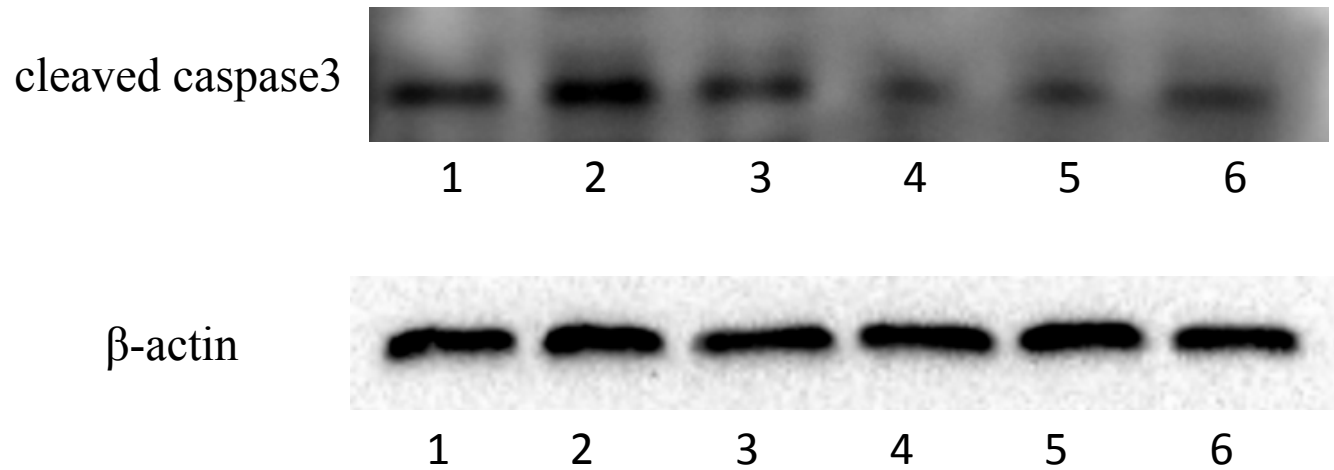

|                    | 1                        | 2                        | 3                        | 4                        | 5                        | 6                        |
|--------------------|--------------------------|--------------------------|--------------------------|--------------------------|--------------------------|--------------------------|
| control siRNA      | +                        | +                        | +                        | <input type="checkbox"/> | <input type="checkbox"/> | <input type="checkbox"/> |
| JAK2 siRNA         | <input type="checkbox"/> | <input type="checkbox"/> | <input type="checkbox"/> | +                        | +                        | +                        |
| catalpol( $\mu$ M) | <input type="checkbox"/> | <input type="checkbox"/> | 40                       | <input type="checkbox"/> | <input type="checkbox"/> | 40                       |
| H/R                | <input type="checkbox"/> | +                        | +                        | <input type="checkbox"/> | +                        | +                        |
